# Supplementary material for: The impact of whole genome and transcriptome analysis (WGTA) on predictive biomarker discovery and diagnostic accuracy of advanced malignancies
Source: PubMed Central journal article supplement — J Pathol Clin Res. 2022 Mar 8;8(4):395–407. doi: 10.1002/cjp2.265 (PMC9161328; doi:10.1002/cjp2.265), 2022-03-08
Supplement: CJP2-8-395-s003.pdf [file CJP2-8-395-s003.pdf]

# The impact of whole genome and transcriptome analysis (WGTA) on predictive biomarker discovery and diagnostic accuracy of advanced malignancies

B Tessier-Cloutier, JK Grewal *et al. J Pathol Clin Res* DOI: 10.1002/cjp2.265

## Supplementary Figures

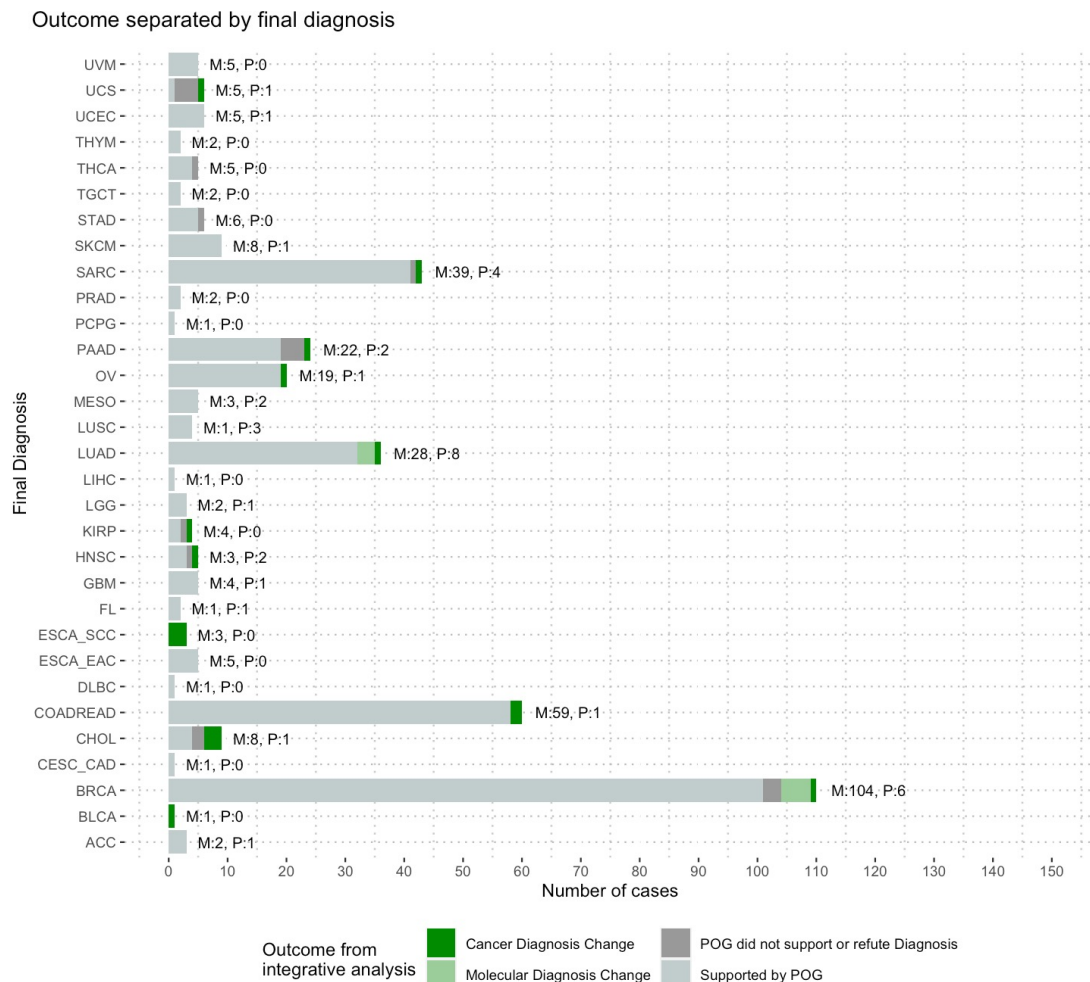

**Figure S1.** Impact of cancer type on the ability of an automated RNA-Seq based classifier (SCOPE) to provide the correct putative diagnosis in the POG cohort. The outcomes are shown separated by cancer type. M and P indicate the number of metastatic and primary/relapse samples respectively.

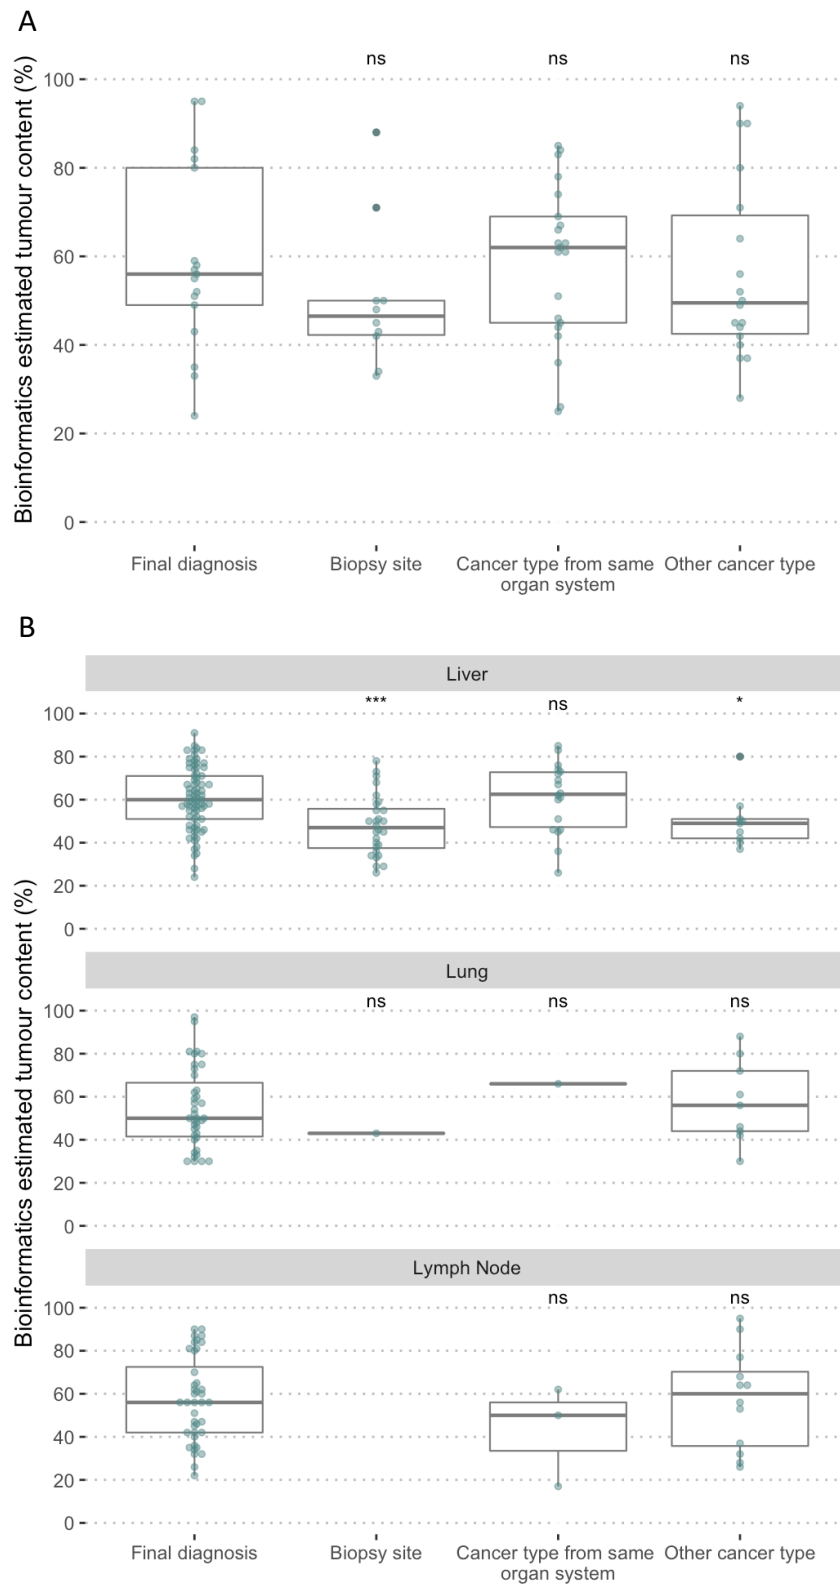

**Figure S2.** Impact of tumor content on the ability of an automated RNA-Seq based diagnostic (SCOPE) to provide the correct putative diagnosis in the POG cohort; (A) agnostic of tumor site and (B) from the main 3 most common biopsy sites. Wilcox test for significance between SCOPE outcome matching final diagnosis, versus each of the other categories: \*  $p < 0.05$ ; \*\*  $p < 0.01$ ; \*\*\*  $p < 0.001$ ; ns  $p > 0.05$ .
